# Supplementary material for: Multi-domain BNiT modification enhanced the piezoelectric properties of BNT-based lead-free thin films
Source: Royal Society of Chemistry journal article supplement (doi:10.1039/d0tc04217j), 2020-01-01
Supplement: d0tc04217j1.pdf [file d0tc04217j1.pdf]

## Supporting Information

### Multi-domains BNiT modification enhanced the piezoelectric properties of BNT-based lead-free thin films

Kun Zhu, Shuanghao Wu, Baijie Song, Guanglong Ge, Yunjing Shi, Liuxue Xu, Hao Yan, Bo Shen,\* Jiwei Zhai\*

Key Laboratory of Advanced Civil Engineering Materials of Ministry of Education, Functional Materials Research Laboratory, School of Materials Science and Engineering, Tongji University, Shanghai, 201804, China.

\* E-mail: shenbo@tongji.edu.cn; apzhai@tongji.edu.cn

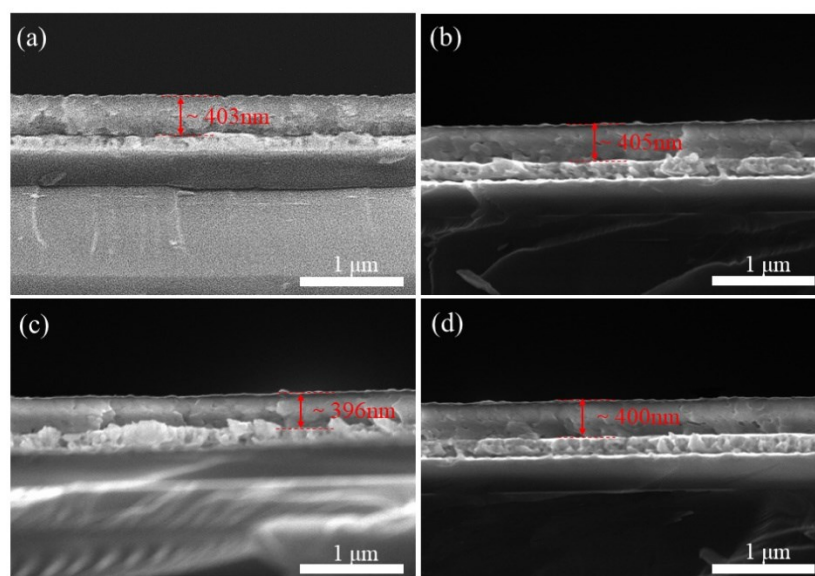

**Fig. S1.** The cross-sectional micrograph of the BT-BT- $x$ BNiT thin film: (a)  $x = 0$ ; (b)  $x = 0.01$ ; (c)  $x = 0.03$ ; (d)  $x = 0.04$ .
